# Supplementary material for: Telehealth and patient satisfaction: a systematic review and narrative analysis
Source: PubMed Central journal article supplement — BMJ Open. 2017 Aug 3;7(8):e016242. doi: 10.1136/bmjopen-2017-016242 (PMC5629741; doi:10.1136/bmjopen-2017-016242), 2017-08-03
Supplement: bmjopen-2017-016242supp001.pdf [file bmjopen-2017-016242supp001.pdf]

1 Supplemental data

2 Search terms

3 Search strings for the two research databases differed because of the differences in the  
4 indexing methods used by each database. PubMed indexes the following under the heading of  
5 telemedicine: telerehabilitation, teleradiology, telepathology, and remote consultation. CINAHL  
6 does not automatically index these terms together so they were searched for by name. The initial  
7 search in PubMed was (telemedicine OR telehealth) AND "Patient Satisfaction."

8
